# Supplementary material for: Human Polymerase δ-Interacting Protein 2 (PolDIP2) Inhibits the Formation of Human Tau Oligomers and Fibrils
Source: MDPI journal article supplement (doi:10.3390/ijms22115768), 2021-05-28
Supplement: s1 [file s1]

## **Supplementary Figures**

### **Human polymerase $\delta$ -interacting protein 2 (PoIDIP2) inhibits the formation of human Tau oligomers and fibrils.**

Kazutoshi Kasho<sup>1</sup>, Lukas Krasauskas<sup>2</sup>, Vytautas Smirnovas<sup>2</sup>, Gorazd Stojkovič<sup>1</sup>,  
Ludmilla A. Morozova-Roche<sup>1\*</sup> and Sjoerd Wanrooij<sup>1\*</sup>

1. Department of Medical Biochemistry and Biophysics, Umeå University, Umeå, Sweden

2. Institute of Biotechnology, Life Sciences Center, Vilnius University, Vilnius, Lithuania.

\*corresponding authors

## Supplementary Figures

### Supplementary Figure S1

**A**

TCGGACTCAGAAGTCAATCAAGAAGCTAAGCCAGAGGTCAAGCCAGAAGTCAAGCCTGAGACTC  
ACATCAATTTAAAGGTGTCCGATGGATCTTCAGAGATCTTCTTCAAGATCAAAAAGACCACTCC  
TTTAAGAAGGCTGATGGAAGCGTTCGCTAAAAGACAGGGTAAGGAAATGGACTCCTTAAGATTC  
TTGTACGACGGTATTAGAATTCAAGCTGATCAGACCCCTGAAGATTTGGACATGGAGGATAACG  
ATATTATTGAGGCTCACAGAGAACAGATTGGTGGGCTGAGCCCCGCCAGGAGTTCGAAGTGAT  
GGAAGATCACGCTGGGACGTACGGGTGGGGGACAGGAAAGATCAGGGGGGCTACACCATGCAC  
CAAGACCAAGAGGGTGACACGGACGCTGGCCTGAAAGAATCTCCCCTGCAGACCCCCACTGAGG  
ACGGATCTGAGGAACCGGGCTCTGAAACCTCTGATGCTAAGAGCACTCCAACAGCGGAAGATGT  
GACAGCACCTTAGTGGATGAGGGAGCTCCCGCAAGCAGGCTGCCGCGCAGCCCCACACGGAG  
ATCCCAGAAGGAACACAGCTGAAGAAGCAGGCATTGGAGACACCCCCAGCCTGGAAGACGAAG  
CTGCTGGTCACGTGACCCAAGCTCGCATGGTCAGTAAAAGCAAAGACGGGACTGGAAGCGATGA  
CAAAAAGCCAAGGGGGCTGATGGTAAAACGAAGATCGCCACACCGCGGGGAGCAGCCCCCTCA  
GGCCAGAAGGGCCAGGCCAACGCCACCAGGATTCCAGCAAAAACCCCGCCCGCTCCAAAGACAC  
CACCCAGCTCTGGTGAACCTCCAAAATCAGGGGATCGCAGCGGCTACAGCAGCCCCGGCTCCCC  
AGGCACTCCCGGCAGCCGCTCCCGCACCCCGTCCCTTCCAACCCACCCACCCGGGAGCCCAAG  
AAGGTGGCAGTGGTCCGTACTCCACCAAGTCGCCGTCTTCCGCCAAGAGCCGCCTGCAGACAG  
CCCCGTGCCCATGCCAGACCTGAAGAATGTCAAGTCCAAGATCGGCTCCACTGAGAACCTGAA  
GCACCAGCCGGGAGGCGGGAAGGTGCAGATAATTAATAAGAAGCTGGATCTTAGCAACGTCCAG  
TCCAAGTGTGGCTCAAAGGATAATATCAAACACGTCCCGGGAGGCGGCAGTGTGCAATAGTCT  
ACAAACCAGTTGACCTGAGCAAGGTGACCTCCAAGTGTGGCTCATTAGGCAACATCCATCATAA  
ACCAGGAGGTGGCCAGGTGGAAGTAAAATCTGAGAAGCTTGACTTCAAGGACAGAGTCCAGTCG  
AAGATTGGGTCCCTGGACAATATCACCCACGTCCCTGGCGGAGGAAATAAAAAGATTGAAACCC  
ACAAGCTGACCTTCCGCGAGAACGCCAAAGCCAAGACAGACCACGGGGCGGAGATCGTGTACAA  
GTCGCCAGTGGTGTCTGGGGACACGTCTCCACGGCATCTCAGCAATGTCTCCTCCACCGGCAGC  
ATCGACATGGTAGACTCGCCCCAGCTCGCCACGCTAGCTGACGAGGTGTCTGCCTCCCTGGCCA  
AGCAGGGTTTGTGA

**B**

DSEVNQEAKPEVKPEVKPETHINLKVSDGSSEIFFKIKKTTPLRRLMEAFARQKGKEMDSLRF  
YDGIRIQADQTPEDLDMEDNDIIEAHREQIGAEPRQEFVMEHDHAGTYGLDRKDQGGYTMH  
QDQEGDTDAGLKESPLQTPTEGSEEPGSETSDAKSTPTAEDVTAPLVDEGAPGKQAAAQPHTE  
IPEGTTAAEEAGIGDTPSLEDEAAGHVTQARMVSKSKDGTGSDDKKAKGADGKTKIATPRGAAPP  
GQKGQANATRIPAKTPPAPKTPPSSGEPPKSGDRSGYSSPGSPGTPGSRSRTPSLPTPPTREP  
KVAVVRTPPKSPSSAKSRLQTAPVPMPLKKNVSKIGSTENLKHQPGGGKVQIINKKLDLSNVQ  
SKCGSKDNIKHVPGGGSVQIVYKPVDSLKVTSKCGSLGNIHHKPGGGQVEVKSEKLDKDRVQS  
KIGSLDNITHVPGGGNKKIETHKLTFRENAKAKTDHGAIEIVYKSPVVSQDTSRHLNSVSTGS  
IDMVDSPLATLADEVSAASLAKQGL-

**Supplementary Figure S1. SUMO-tagged Tau used in this study.** (A) Nucleotide and (B) amino acid sequence of SUMO-Tau protein construct. Color legend: yellow; SUMO, magenta; ULP1 recognition sequence including cleavage site (I), sky blue; Tau (hTau441), and red; Stop codon.

## Supplementary Figures

### Supplementary Figure S2

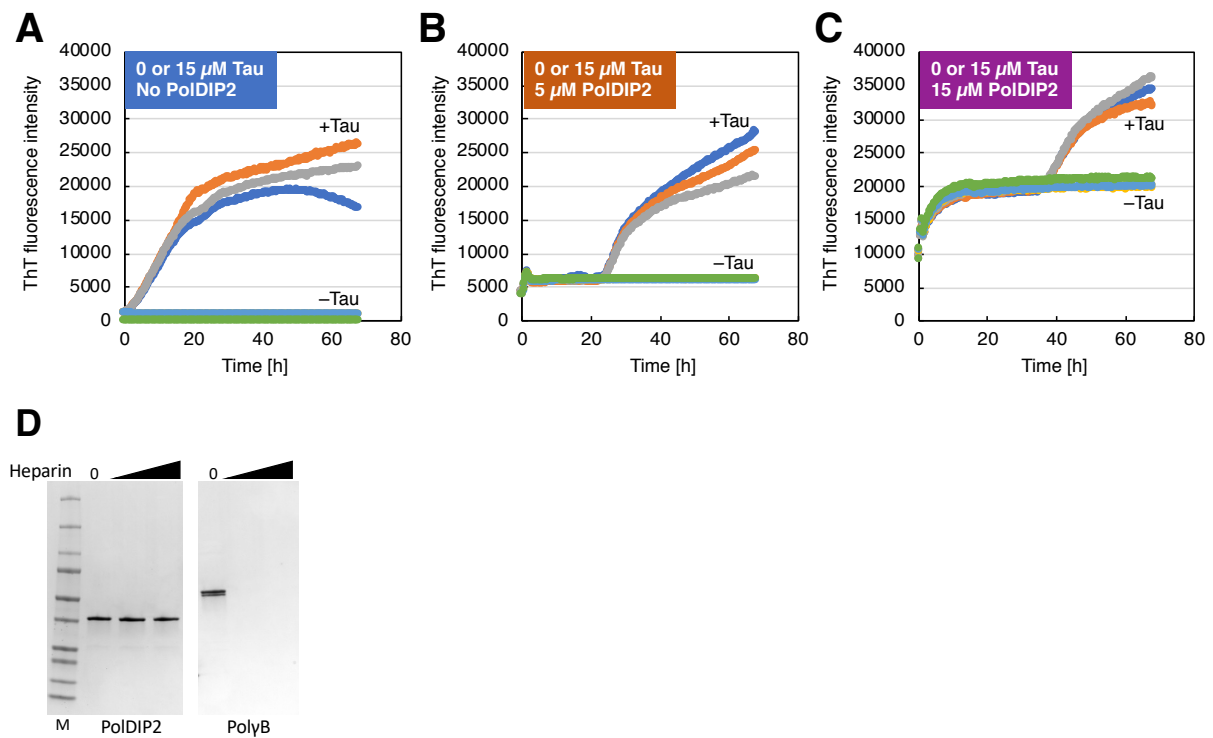

**Supplementary Figure S2. PolDIP2-dependent inhibition of Tau aggregation, related to Figure 2A.** 15  $\mu\text{M}$  Tau in the presence of 8  $\mu\text{M}$  heparin was incubated at 37°C in the absence (A) or presence of 5  $\mu\text{M}$  (B) or 15  $\mu\text{M}$  of PolDIP2 (C) and 50  $\mu\text{M}$  of ThT. Reactions were done in 96-well microplates and fluorescent intensities were measured at 15 minutes intervals. Raw data was obtained from three replicates. (D) Interaction between PolDIP2 and heparin. 5  $\mu\text{M}$  PolDIP2 was incubated with increasing concentrations of heparin sepharose beads (corresponding to heparin concentrations of 0, 8 and 40  $\mu\text{M}$ ) at 37°C for 30 min. The beads were pelleted and the unbound fraction (supernatant) was analyzed using SDS-PAGE.

## Supplementary Figures

### Supplementary Figure S3

**A**

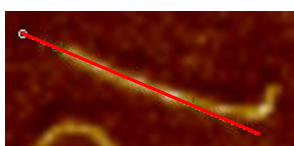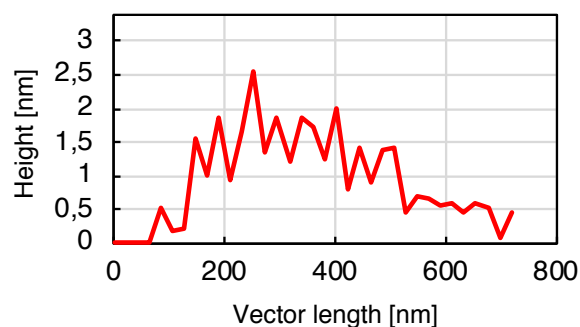

**B**

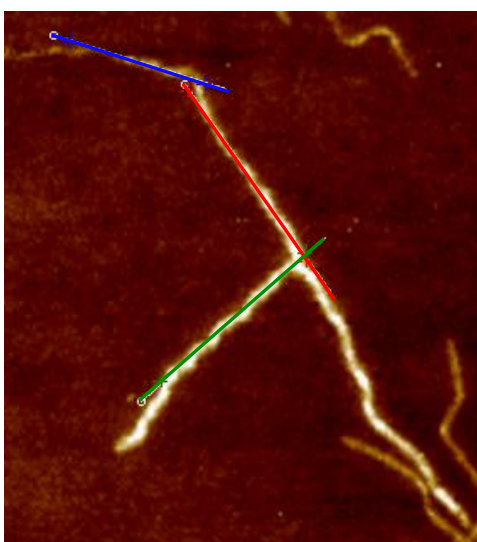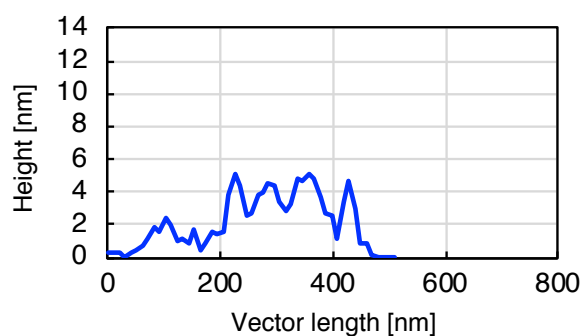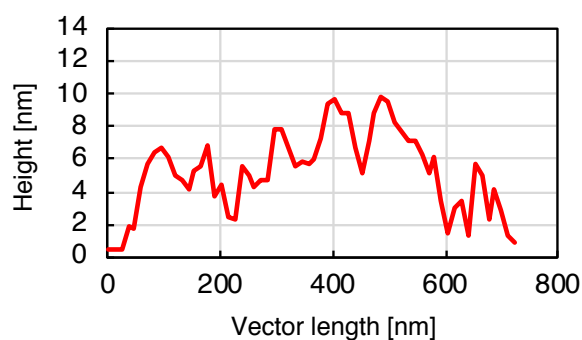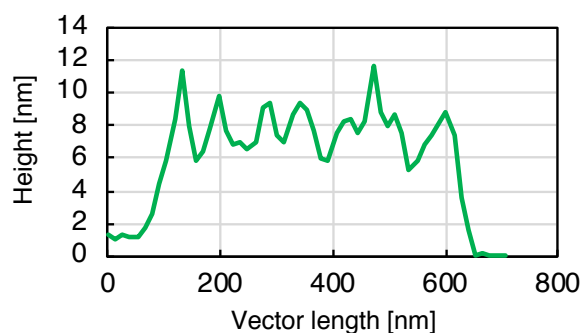

**Supplementary Figure S3. The height of Tau “long fibrils” measured in AFM cross-sections, related to Figure 3A at 48 h incubation.** The AFM cross-sections are shown in the panels next to the corresponding image. One thin fibril (A) and one thick, branched and intertwined fibril (B) were selected. The position of the cross-sections are shown by lines in the AFM images in the same colour-coding.



## Supplementary Figures

### Supplementary Figure S4

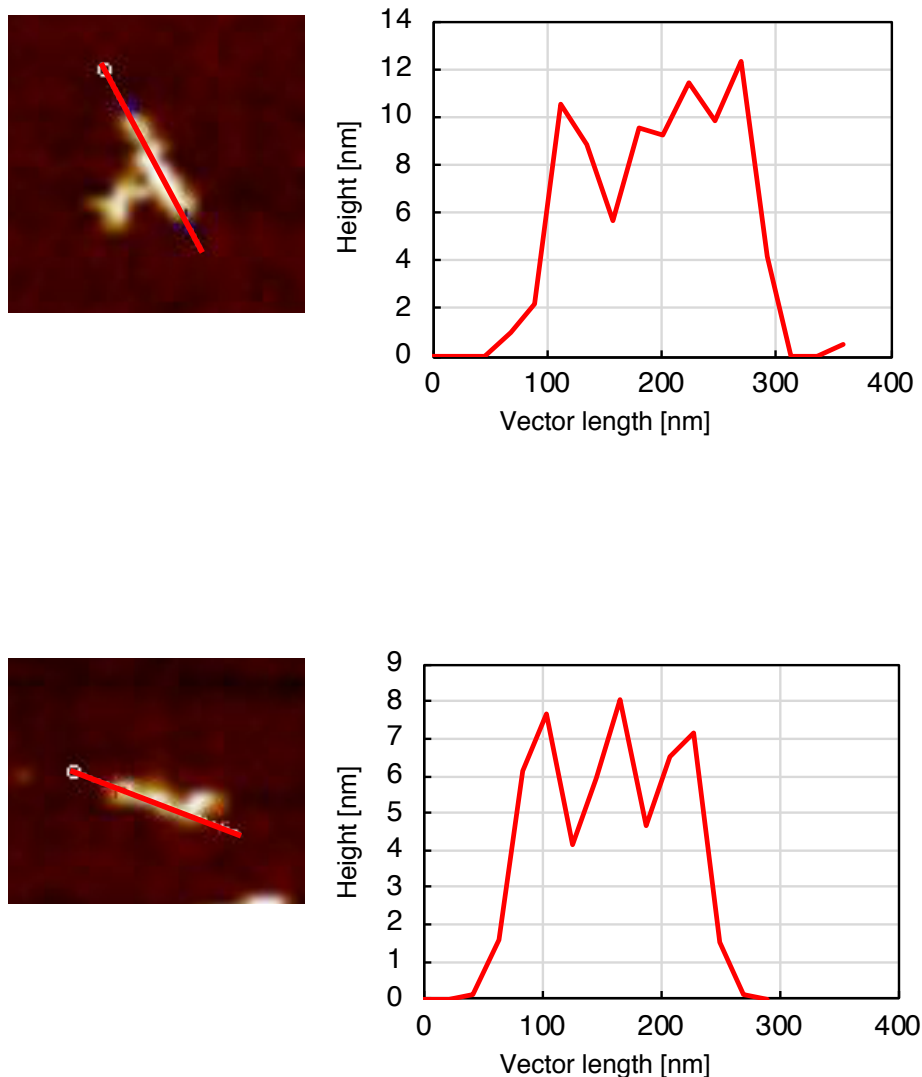

**Supplementary Figure S4. The height of “short fibrils” of Tau incubated in the presence of PoIDIP2 for 48 h and measured in AFM cross-section; related to Figure 3B.** The AFM cross-sections are shown next to the corresponding images. Two fibrils were chosen from the images of Tau + PoIDIP2 sample with 48 h incubation in Figure 3B. The position of the cross-sections are shown by red lines in the AFM images.

## Supplementary Figures

### Supplementary Figure S5

**A**

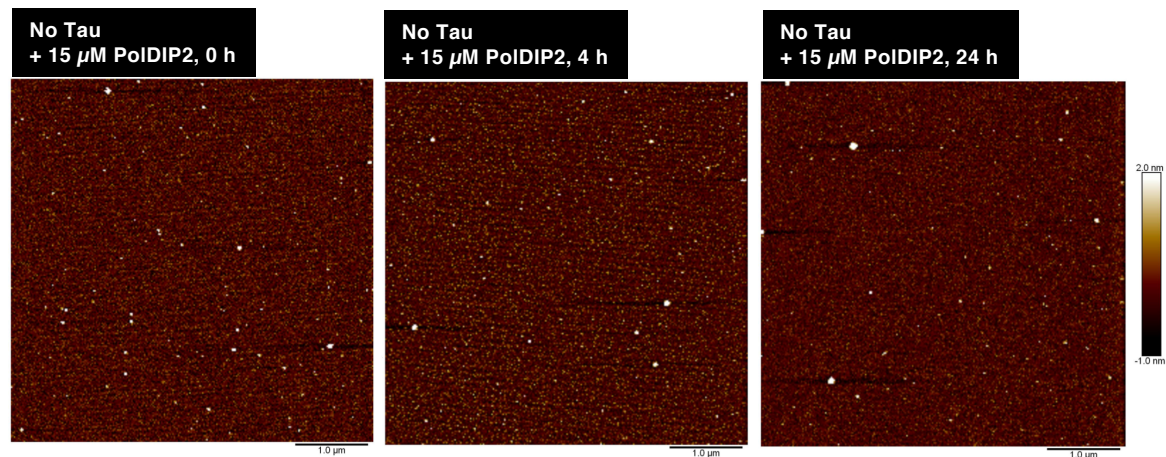

**B**

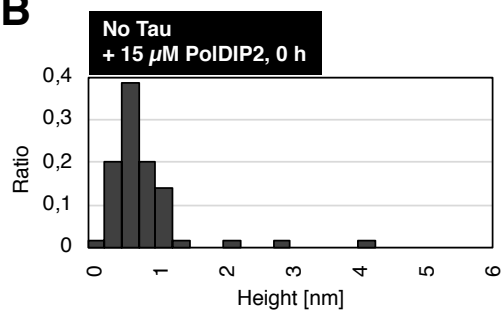

**C**

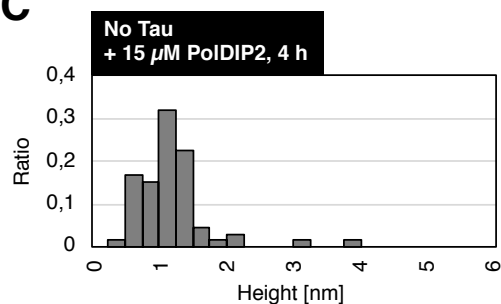

**D**

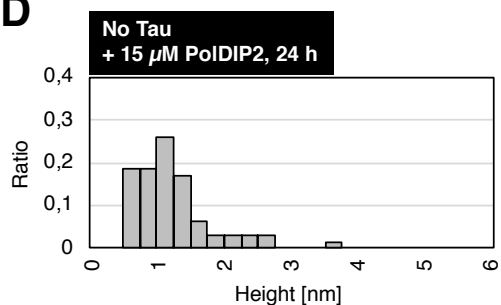

**Supplementary Figure S5. Self-assembly of PolDIP2 into round-shaped particles during its incubation monitored by AFM.** (A) AFM images of PolDIP2 (15  $\mu$ M) samples at 0, 4 and 24 h. (B) The height distribution of round-shaped particles in the samples with 15  $\mu$ M PolDIP2 measured at 0 h (B), 4 h (C) or 24 h (D), analyzed using AFM cross-sections. Distributions are presented with bar charts.

## Supplementary Figures

### Supplementary Figure S6

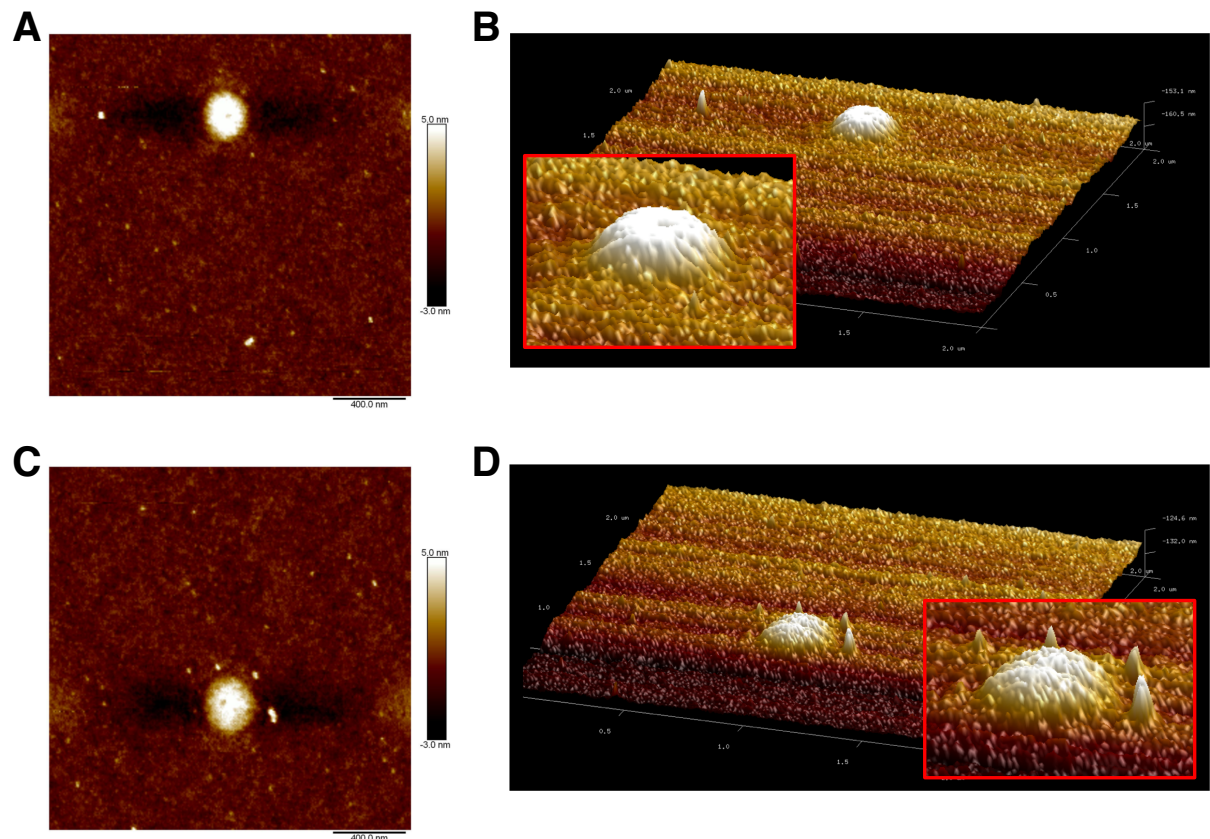

**Supplementary Figure S6. “Particulates” in Tau + PoIDIP2 sample incubated for 48 h, related to Figure 5.** (A and C) Two different AFM images of 15  $\mu$ M of Tau + 5  $\mu$ M of PoIDIP2 at 48 h reaction time (sample from the same reaction as Figure 2A). (B and D) The 3D AFM visualization of the same “particulate” as shown A and C. The “particulates” are highlighted using red squares.

## Supplementary Figures

### Supplementary Figure S7

|                |                                                               |     |
|----------------|---------------------------------------------------------------|-----|
| PolDIP2_Human  | MAACTARRALAVGSRWWSRSLTGARWPRPLCAAAGAGAFSPASTTTTTRRHLSSNRNPEGK |     |
| TauPHF6_Human  | -----                                                         |     |
| TauPHF6*_Human | -----                                                         |     |
|                |                                                               |     |
| PolDIP2_Human  | VLETVGVFVFPKQNGKYETGQLFLHSIFGYRGVVLFPWQARLYDRDVASAAPEKAENPAG  |     |
| TauPHF6_Human  | -----                                                         |     |
| TauPHF6*_Human | -----                                                         |     |
|                |                                                               |     |
| PolDIP2_Human  | HGSKEVKGKTHTYYQVLIDARDCPHISQRSQTEAVTFLANHDDSRALYAIPGLDYVSHED  |     |
| TauPHF6_Human  | -----                                                         |     |
| TauPHF6*_Human | -----                                                         |     |
|                |                                                               |     |
| PolDIP2_Human  | ILPYTSTDQVPIQHELPERFLLYDQTKAPPFVARETLRAWQEKNHWPWLELSDVHRETTEN |     |
| TauPHF6_Human  | -----                                                         |     |
| TauPHF6*_Human | -----                                                         |     |
|                |                                                               |     |
| PolDIP2_Human  | IRVTVIPFYMGMRQAQNSHVYWWRYCIRLENLSDVVLRLRHRWRIFSLSGTLETVRGRG   |     |
| TauPHF6_Human  | -----VQIVYK-----                                              |     |
| TauPHF6*_Human | -----VQIINK-----                                              |     |
|                | **:  :                                                        |     |
|                |                                                               |     |
| PolDIP2_Human  | VVGREPVLSEKQPAFYSSHVSLQASSGHMWGTFRFERPDGSHFDVRIPPFSLESNKDEK   |     |
| TauPHF6_Human  | -----                                                         |     |
| TauPHF6*_Human | -----                                                         |     |
|                |                                                               |     |
| PolDIP2_Human  | TPPSGLHW                                                      | 368 |
| TauPHF6_Human  | -----                                                         | 6   |
| TauPHF6*_Human | -----                                                         | 6   |

**Supplementary Figure S7. Sequence similarity between PolDIP2 and Tau.** Amino acid sequence of PolDIP2 was compared with Tau PHF6 (VQIVYK) and PHF6\* (VQIINK) motifs using protein multiple sequence alignment tool Clustal Omega (EMBL-EBI). Identical amino acids are shown with a star (\*), and those with similar chemical property are indicated with double dots (:).
